# Supplementary material for: Genetically Depauperate and Still Successful: Few Multilocus Genotypes of the Introduced Parthenogenetic Weevil Naupactus cervinus (Coleoptera: Curculionidae) Prevail in the Continental United States
Source: MDPI journal article supplement (doi:10.3390/insects14020113), 2023-01-22
Supplement: s1 [file s1]

**Table S1** GenBank Accession Numbers for mitochondrial haplotypes and nuclear alleles retrieved from Rodriguero et al. 2010, 2013, 2016, 2018.

| COI Haplotypes | Accession Numbers |
|----------------|-------------------|
| A              | GQ406827.1        |
| B              | GQ406828.1        |
| C              | GQ406829.1        |
| D              | GQ406830.1        |
| E              | GQ406831.1        |
| F              | GQ406832.1        |
| G              | GQ406833.1        |
| H              | GQ406834.1        |
| I              | GQ406835.1        |
| J              | GQ406836.1        |
| K              | GQ406837.1        |
| L              | GQ406838.1        |
| M              | GQ406839.1        |
| N              | GQ406840.1        |
| O              | KX074095.1        |
| P              | GQ406841.1        |
| Q              | GQ406842.1        |
| R              | GQ406843.1        |
| S              | JX440490.1        |
| T              | KC614562.1        |
| U              | GU727685.2        |
| V              | KX074096.1        |
| W              | KX074097.1        |
| X              | KX074098.1        |

| ITS1 Alleles | Accession Numbers |
|--------------|-------------------|
| I            | GQ406818.1        |
| II           | GQ406819.1        |
| III          | GQ406820.1        |
| IV           | GQ406821.1        |
| V            | GQ406822.1        |
| VI           | GQ406824.1        |
| VII          | GQ406823.1        |
| VIII         | GQ406825.1        |
| IX           | JX440499.1        |
| X            | KC614561.1        |
| XI           | JX440500.1        |
| XII          | KX074088.1        |
| XIII         | KX074089.1        |
| XIV          | KX074090.1        |
| XV           | KX074091.1        |
| XVI          | KX074092.1        |
| XVII         | KX074093.1        |
| XVIII        | KX074094.1        |
| XIX          | KY305942.1        |
